# Supplementary material for: A new computational approach to analyze human protein complexes and predict novel protein interactions
Source: Springer Nature journal article supplement (doi:10.1186/gb-2007-8-12-r256), 2007-12-04

**A**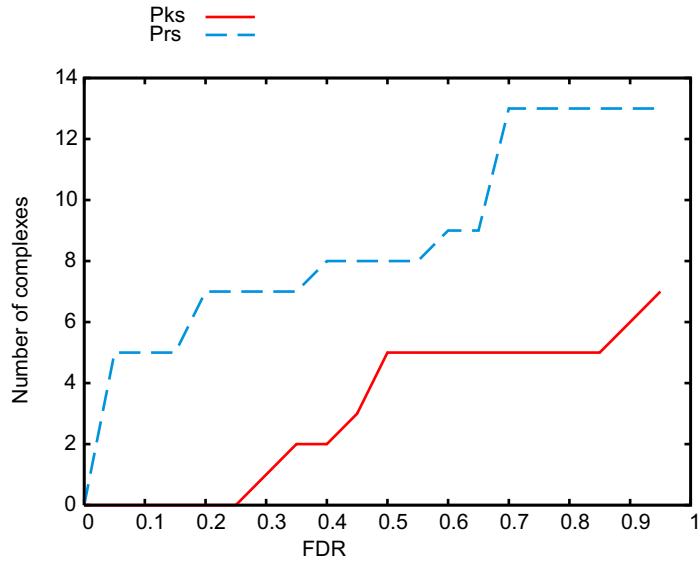**B**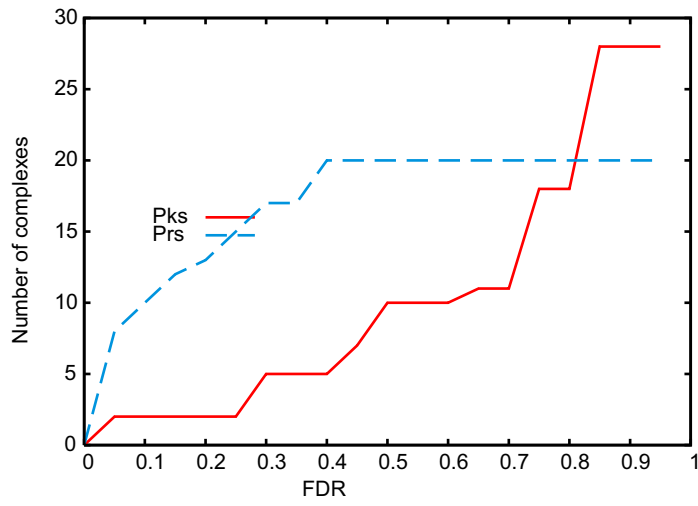**C**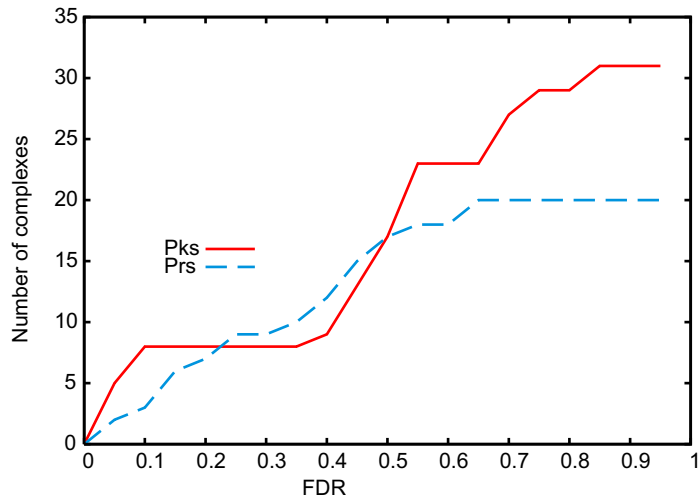

Supplement: Additional file 4 [file gb-2007-8-12-r256-s4.pdf]
